# Supplementary material
Source: PubMed Central journal article supplement (PMC2806068)
Supplement: Supp_Data.pdf [file Supp_Data.pdf]

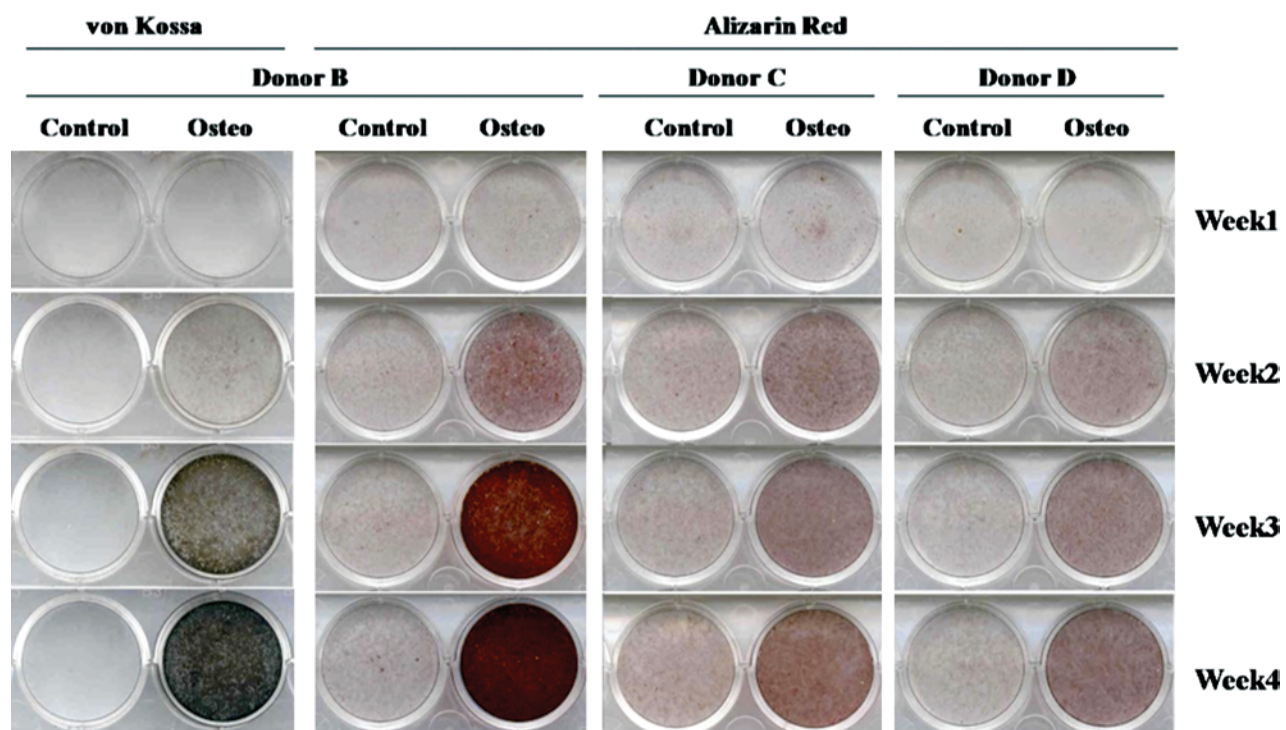

**SUPPLEMENTAL FIG. S1.** Mineral deposition by human adipose-derived stem cells in monolayer culture: effects of medium composition, time of culture, and donor-to-donor variation. Osteogenesis in cells from donors B, C, and D was assessed at four different time points (1–4 weeks) in osteogenic and control medium (Control vs. Osteo) by alizarin red and/or von Kossa staining for mineral deposition. Cells from donor B had the strongest osteogenic responses, relatively to the cells from donors C and D that exhibited significantly lower levels of mineralization. Optical density measurements of the intensity of alizarin red staining further corroborate the effects medium composition, time of culture, and the variation in the osteogenic cell potential from different donors.

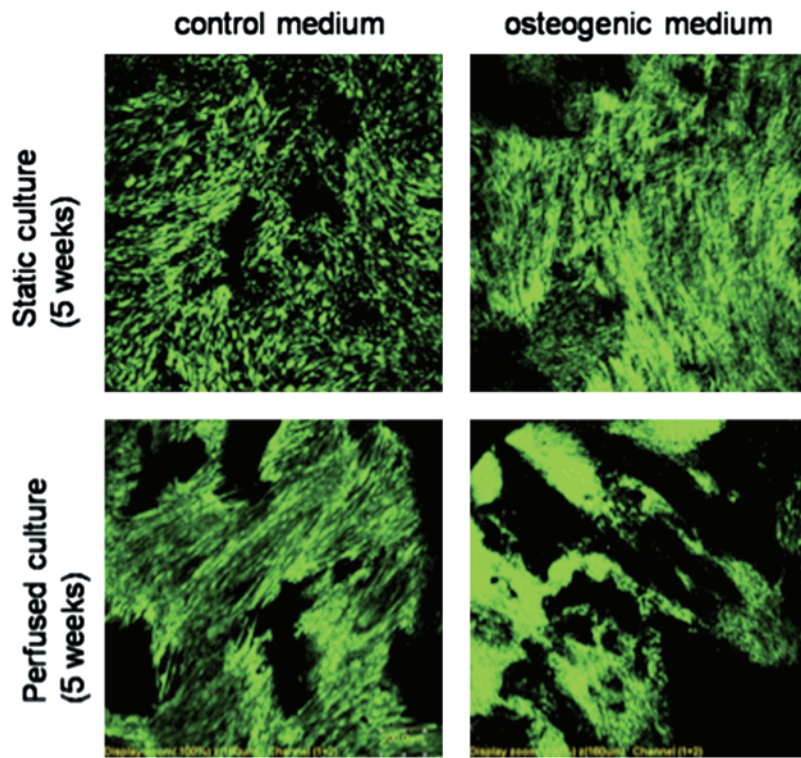

**SUPPLEMENTAL FIG. S2.** Cell viability in tissue constructs after 5 weeks of culture. After 5 weeks of culture, tissue constructs from all groups contained viable cells (green indicates live cells and red would indicate dead cells). Live/dead assay is shown for the regions measuring 1.3×1.3 mm.
